## Within-patient mutation frequencies reveal fitness costs of CpG dinucleotides and drastic amino acid changes in HIV

Kristof Theys<sup>1</sup>, Alison F. Feder<sup>2</sup>, Maoz Gelbart<sup>3</sup>, Marion Hartl<sup>4</sup>, Adi Stern<sup>3</sup>, Pleuni S. Pennings<sup>4\*</sup>

**1** Clinical and Epidemiological Virology, Department of Microbiology and Immunology, Rega Institute for Medical Research, KU Leuven, University of Leuven, Leuven, Belgium

**2** Department of Biology, Stanford University, Stanford, California, USA

**3** School of Molecular Cell Biology and Biotechnology, George S. Wise Faculty of Life Sciences, Tel Aviv University, Tel Aviv, Israel

**4** Department of Biology, San Francisco State University, San Francisco, California, USA

These authors contributed equally to this work.

\* E-mail: [pennings@sfsu.edu](mailto:pennings@sfsu.edu) (PSP)

February 2018

## Abstract

HIV has a high mutation rate, which contributes to its ability to evolve quickly. However, we know little about the fitness costs of individual HIV mutations *in vivo*, their distribution and the different factors shaping the viral fitness landscape. We calculated the mean frequency of transition mutations at 870 sites of the *pol* gene in 160 patients, allowing us to determine the cost of these mutations. As expected, we found high costs for non-synonymous and nonsense mutations as compared to synonymous mutations. In addition, we found that non-synonymous mutations that lead to drastic amino acid changes are twice as costly as those that do not and mutations that create new CpG dinucleotides are also twice as costly as those that do not. We also found that G→A and C→T mutations are more costly than A→G mutations. We anticipate that our new *in vivo* frequency-based approach will provide insights into the fitness landscape and evolvability of not only HIV, but a variety of microbes.

## Author summary

HIV's high mutation rate allows it to evolve quickly. However, most mutations probably reduce the virus' ability to replicate – they are costly to the virus. Until now, the actual cost of mutations is not well understood. We used within-patient mutation frequencies to estimate the cost of 870 HIV mutations *in vivo*. As expected, we found high costs for non-synonymous and nonsense mutations. In addition, we found surprisingly high costs for mutations that lead to drastic amino acid changes, mutations that create new CpG sites (possibly because they trigger the host's immune system), and G→A and C→T mutations. Our results demonstrate the power of analyzing mutant frequencies from *in vivo* viral populations to study costs of mutations. A better understanding of fitness costs will help to predict the evolution of HIV.

## 1 Introduction

The human immunodeficiency virus (HIV) replicates with an extremely high mutation rate and exhibits significant genetic diversity within an infected host, often referred to as a “mutant cloud” or “quasispecies” [1–7]. Although mutations are crucial for all adaptive processes, they can have fitness costs. Thus, to understand the evolution of HIV, it is important to know the fitness costs of mutations *in vivo*. Fitness costs influence the probability of evolution from standing genetic variation (often referred to as pre-existing mutations). Fitness costs also determine the effects of background selection (i.e., the effects of linked deleterious mutations on neutral or beneficial mutations) and thus affect optimal recombination rates. All of these processes affect drug resistance and immune escape in HIV [8–12]. Moreover, in addition to a better understanding of evolutionary processes in HIV and in general, a detailed knowledge of mutation costs could help us discover new functional elements in the HIV genome.

In infinitely large populations, deleterious mutations are present at a constant frequency equal to  $u/s$ , where  $u$  is the mutation rate from wild-type to the mutant and  $s$  is the selection coefficient that reflects the negative fitness effect, or cost, of the mutation [13, 14]. In natural populations of finite size, however, the frequency of mutations is not constant; instead it fluctuates around the expected frequency of  $u/s$ , because of the stochastic nature of mutation and drift [13]. Due to these stochastic fluctuations of frequencies, it is impossible to accurately infer the strength of selection acting on individual mutations (i.e., their cost) from a single observation of a single (finite size) population. This is why most approaches based on the frequencies of mutations have to aggregate mutations in groups so that a distribution of frequencies (the “site frequency spectrum”) can be analyzed and compared between groups of mutations. This approach can therefore never lead to fitness estimates of individual mutations. Alternative approaches to assess fitness effects are mostly based on (1) phylogenetic or entropy-based approaches which use between-population or between-species differences (substitutions) as opposed to within-population variation [15–21] or (2) they use *in vitro* systems to measure fitness effects (e.g., times series or competition experiments in cell culture [22–26]). These approaches have their limitations. The phylogenetic approaches estimate fitness costs over very long timescales, and it is unclear how relevant those estimates are for current viral populations. The entropy-based methods focus on fairly small subsets of common mutations and exclude the vast majority of

28 mutations because they are rare. Regarding the approaches based on *in vitro* systems, it is unclear whether  
29 fitness costs are similar to *in vivo* fitness costs.

30 HIV has unique properties that allow us to study fitness effects *in vivo*: It is fast evolving [27–31] and leads  
31 to persistent infections [32–34]. This means that genetic diversity accumulates quickly and independently  
32 in every host, and samples from different patients can thus be treated as independent replicate populations  
33 [35, 36]. By aggregating data on the exact same mutation from many patients, the mean frequency of the  
34 mutation will approach  $u/s$  and can therefore be used to estimate its fitness cost, because the fluctuations  
35 in mutation frequencies represent an ergodic process [37]. Based on this logic, we present a novel approach  
36 that uses observed mutation frequencies in many HIV-infected patients to determine the fitness effects of  
37 mutations *in vivo*. For this analysis, we assume that there are no epistatic interactions and that selection  
38 coefficients and mutation rates do not vary between patients. A variation of this approach was employed in  
39 parallel to us by Zanini *et al.* to estimate HIV fitness values from nine infected patients [31]. Reassuringly  
40 our basic results overlap with Zanini *et al.*; here we also report on novel genomic insights obtained by our  
41 method.

42 In the current study, we demonstrate the utility of this new approach. We focus on transition mutations  
43 ( $A \leftrightarrow G$  and  $C \leftrightarrow T$ ) in 870 sites of the *pol* gene, which encodes HIV’s protease protein and part of the  
44 reverse transcriptase (RT) protein, in 160 patients infected with HIV-1 subtype B. Transitions are much  
45 more common in HIV than transversions [29], and thus sufficient data are available for these mutations; we  
46 focus on the *pol* gene because it is highly conserved and its products experience less direct contact with the  
47 immune system than the exposed product of the much more variable envelope (*env*) gene [32, 33]. Finally, we  
48 excluded mutations at drug resistance-related sites, because the samples we use came from patients receiving  
49 several different treatments. Accordingly, we expect that the mutations that we did include in our study are  
50 deleterious.

51 We report that this proof-of-concept of our *in vivo* frequency-based approach allowed us to quantify  
52 known properties of mutational fitness costs (such as differences between synonymous, non-synonymous and  
53 nonsense mutations), and it also revealed novel insights into the evolutionary constraints of the HIV genome  
54 (such as the surprising cost of mutations that form a CpG site and of  $G \rightarrow A$  and  $C \rightarrow T$  mutations). The  
55 fitness effects are surprisingly independent of the location in the gene (although we do find a small difference  
56 between mutations in *RT* versus mutations in *protease*). Because we study a large number of mutations,  
57 it was possible to determine how characteristics of mutations affected their costs in more detail than has  
58 previously been possible. Our results demonstrate the power of analyzing mutant frequencies from *in vivo*  
59 viral populations to study the fitness effects of mutations.

## 60 2 Results

### 61 2.1 Data are consistent with model assumptions

62 An important assumption for the proposed method is that the mutation frequencies are drawn from indepen-  
63 dent populations (each patient harbors an independent HIV population) that are in mutation-selection-drift  
64 equilibrium. This assumption could be violated if the subtype B epidemic in the United States is not in  
65 mutation-selection-drift equilibrium and if samples were taken soon after a person was infected. In that case,  
66 several patient samples may share high frequency variants of a mutation, which violates the assumption of  
67 independence. To minimize the potential confounding effect of shared high frequency variants, we removed  
68 all site/patient combinations where the mutant frequency of the sample from the first time point for a patient  
69 was not 0%. This filtering step removed 6% of the data.

70 A further assumption of our approach is that within-patient populations are in mutation-selection-drift  
71 balance. We tested whether the data were consistent with this assumption. For each site, we used the  
72 mean frequency of the mutant and the mutation rate estimate from Abram *et al* [29, 38] to estimate the  
73 selection coefficient. With this point estimate of the selection coefficient, the nucleotide-specific mutation  
74 rate estimate from Abram *et al* [29, 38] and a population size of  $N = 5,000$ , we ran individual-based  
75 simulations to create 160 population frequencies for the given mutation (following [35]). Next, we sampled  
76 from these simulated populations using the sample sizes of the real data. The resulting simulated sample  
77 frequencies were then compared with the observed sample frequencies using a Mann-Whitney test. At 91%  
78 of the sites, the simulated frequencies were not significantly different than the observed frequencies, using 5%

79 significance level. The remaining 9% may be governed by epistasis or may be adaptive, or may have different  
80 fitness effects in different patients, so that mutation-selection balance may not describe the dynamics of  
81 these mutations well. We repeated this analysis for a range of population sizes and found very similar results  
82 (results not shown). This result gives us confidence that the mutation-selection-drift equilibrium describes  
83 the actual dynamics in the patients well (see figure 1).

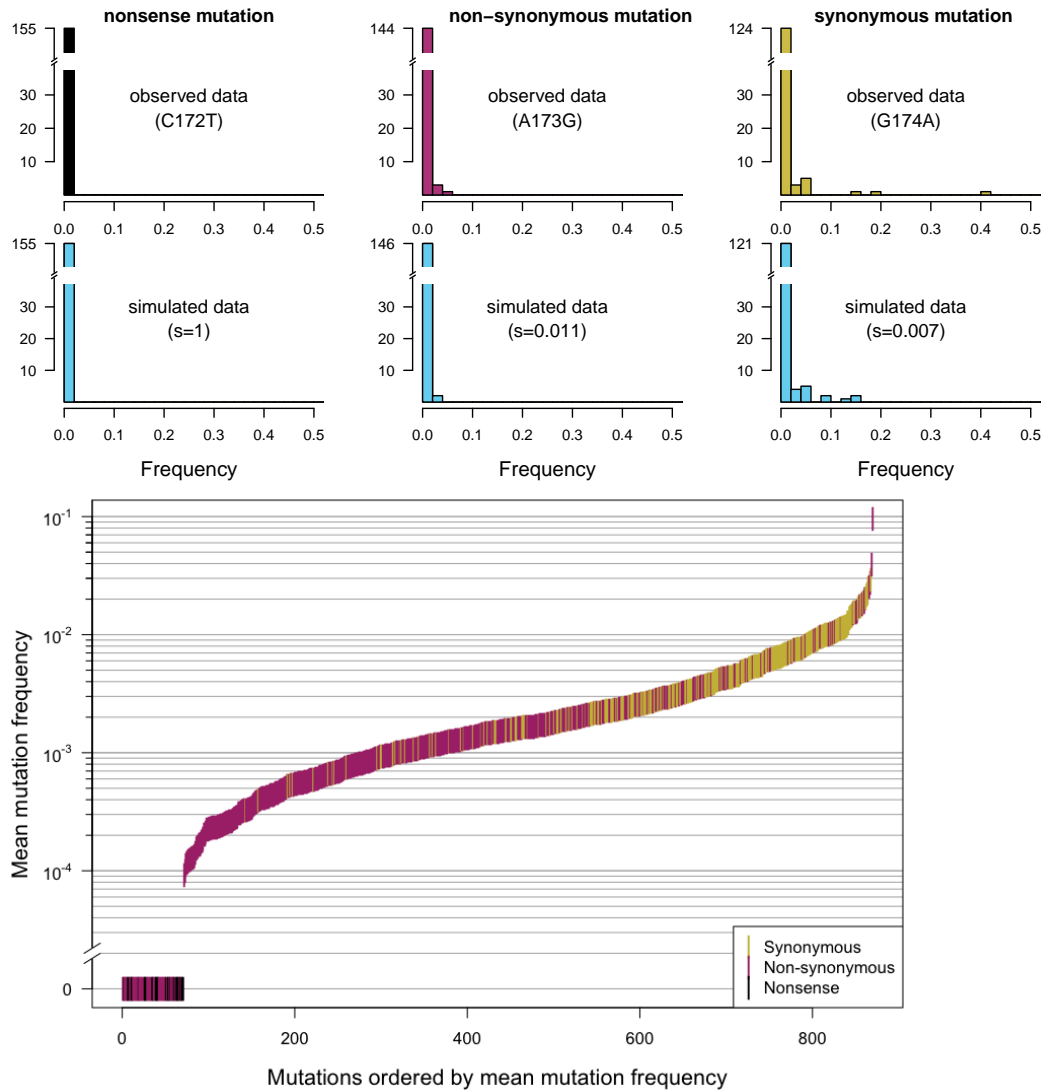

Figure 1: **Different frequency patterns of synonymous, non-synonymous and nonsense mutations.** As expected, in the HIV *pol* gene, synonymous mutations occurred more frequently than non-synonymous mutations, which occurred more frequently than nonsense mutations, which were not observed at all. A) First row: Single-site frequency spectrum for three sites in the HIV *protease* protein (sites 172, 173 and 174). Second row: simulated data based on estimated selection coefficients. B) Mean mutation frequencies for all sites, ordered by mutation frequency.

## 2.2 A clear difference between the costs of synonymous, non-synonymous and nonsense mutations

Now that we are confident that our main model assumptions hold, we compared mutation frequencies for the three main classes of mutations: synonymous, non-synonymous and nonsense mutations. As an example, we show the observed and simulated frequency spectra at all three nucleotides of codon 58 of the protease protein, which comprises nucleotides 172 through 174 (Fig. 1A). The transition mutation at the first position (172) creates a premature stop codon. As expected for a lethal mutation, this nonsense mutation was never observed in the data and thus has a frequency of zero in all patients. A transition mutation at the second codon position (173) leads to an amino acid change (glutamine to arginine), and also creates a CpG dinucleotide. This mutation was found at low frequencies in some patients (between 0 and 4%). The average frequency was 0.001, suggesting a selection coefficient of 0.011. A synonymous mutation at the third position of the codon (174) was observed at a wide range of frequencies (mean frequency 0.008, estimated selection coefficient 0.007, see Fig. 1A). The simulated data for all three nucleotides are shown in blue in the second row of the figure.

The pattern that synonymous mutations are found at higher frequencies than non-synonymous mutations, which were found at higher frequencies than nonsense mutations was seen in the entire dataset. To illustrate this, we ordered all sites according to observed mutation frequencies and plotted the three categories of mutations in three colors (Fig. 1B). The distributions of the mean frequencies for each of the three main categories of mutations were significantly different (one-sided two-sample Wilcoxon test,  $p < 2.2 \cdot 10^{-16}$  for nonsense vs non-synonymous mutations and for non-synonymous vs synonymous mutations; Fig. 1B). All nonsense mutations had an average frequency of zero, and so did some non-synonymous mutations. Most non-synonymous mutations had a lower frequency than synonymous mutations (80% of non-synonymous mutations were present at a frequency lower than 0.002, whereas 82% of synonymous mutations were present at a frequency higher than 0.002). This difference in distributions probably reflects the higher cost of non-synonymous mutations, which are more likely to directly affect virus replication. This analysis therefore provides a proof of principle that our approach works: The observed frequencies reflect the relative costs we would expect for these broad categories of mutations.

## 2.3 GLM shows costs associated with mutations that create new CpG dinucleotides, G-A and C-T mutations and mutations that lead to drastic amino acid changes.

To determine how various mutation characteristics affect observed frequencies of synonymous and non-synonymous mutations, we fit a generalized linear model (GLM). Nonsense mutations are excluded for this analysis because they were never observed (all frequencies were zero). The advantage of using a GLM is that we can directly analyze raw counts as opposed to frequencies. This approach automatically gives more weight to patients for whom we have more sequences, and it allows us to investigate several effects simultaneously (see Methods). The effects we considered were 1. whether a site is part of *protease* vs. *reverse transcriptase*, 2. the shape value (an experimentally determined measure of RNA secondary structure [39]), 3. the ancestral nucleotide (A, C, G or T), 4. whether a mutation is synonymous or non-synonymous, 5. whether a mutation would create a new CpG site and 6. whether a mutation leads to a drastic amino acid change or not. Amino acid changes were considered drastic when the transition changes the encoded amino acid from one major amino acid group (positively charged, negatively charged, uncharged, hydrophobic and special cases) to another (see Methods). The GLM results are shown in Table 1 and Fig 2. We used estimated mutation rates from Abram *et al* [29,38] and the mutation-selection formula ( $f = u/s$ ) to translate the observed frequencies into selection coefficients (costs).

As we saw previously, non-synonymous mutations have lower frequencies than synonymous mutations (line 9 in Table 1,  $p < 0.001$ ), which means that they are more costly. We will now look into synonymous and non-synonymous mutations in more detail.

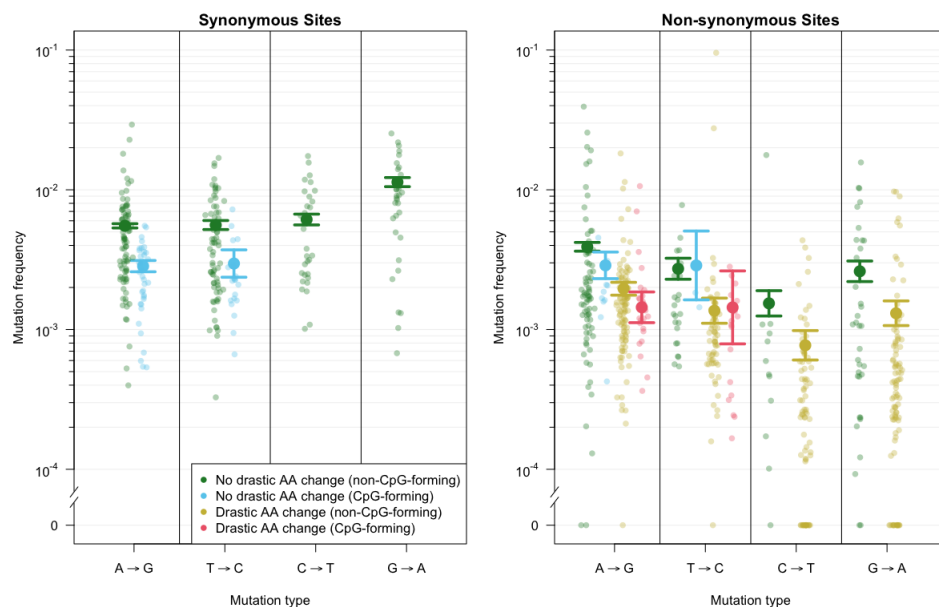

Figure 2: **Predicted and observed mutation frequencies for different mutation classes.** Mutation frequencies as predicted by the generalized linear model (large dots) and observed frequencies (small dots). The horizontal lines show the standard errors from the GLM. The graph shows the model predictions for synonymous and non-synonymous mutations that do not involve a drastic amino acid change and either form CpG sites (blue) or do not (green). In addition, for non-synonymous mutations, predictions are shown for mutations that involve a drastic amino acid change and either form CpG sites (light red) or do not (yellow).

### 131 CpG sites

132 Among synonymous mutations, a strong effect was associated with whether or not a mutation created a  
 133 new CpG dinucleotide site. A→G mutations and T→C mutations that created new CpG sites were found  
 134 at significantly lower frequencies than A→G mutations and T→C mutations that did not ( $p < 0.001$ ,  
 135 line 7 in Table 1) (note that G→A and C→T mutations cannot create new CpG sites). Using model-  
 136 predicted frequencies and known mutation rates, we find that CpG-creating synonymous mutations are 2  
 137 times more costly (selection coefficient appr. 0.004 for both A→G mutations and T→C mutations), than  
 138 the corresponding non-CpG-creating synonymous mutations (selection coefficient appr. 0.002 for both A→G  
 139 mutations and T→C mutations). This finding is consistent with the hypothesis that CpG sites are costly  
 140 for RNA viruses because they trigger the host antiviral cellular response [40–44].

141 Non-synonymous mutations that create CpG sites are also found at lower frequencies than non-synonymous  
 142 mutations that do not create CpG sites (Fig. 2). However, the effect of creating a CpG site is not as strong  
 143 in non-synonymous sites as it is in synonymous sites leading to a positive GLM coefficient (lines 13 and 14  
 144 in Table 1,  $p < 0.001$ ). The difference in frequencies shows that, among mutations that do not lead to a  
 145 drastic amino acid change, A→G mutations that create a CpG site are approximately one-and-a-half times  
 146 more costly than those that do not (0.0039 vs 0.0028).

### 147 Ancestral nucleotide

148 We also found an effect of the nucleotide in the consensus sequence (i.e., the presumed ancestral nucleotide):  
 149 synonymous G→A mutations were observed at higher frequencies than the other mutations (line 6 Table  
 150 1), but given their high mutation rate, their frequencies were actually lower than expected. We could not  
 151 test whether this effect was significant using the GLM framework, but a one-sided two-sample Wilcoxon  
 152 test showed that the difference in estimated selection coefficients for G→A mutations and non-CpG-forming  
 153 A→G mutations was highly significant ( $p = 5 \cdot 10^{-9}$ ). Indeed, the estimated selection coefficients based  
 154 on model predictions suggested that synonymous G→A mutations are two-and-a-half times as costly as



Table 1: **Predictors of frequencies for mutations in the *pol* gene, estimated using a generalized linear model (GLM).** The intercept (\*) is estimated for synonymous, non CpG-forming A→G mutations in protease with shape value 0. The predicted frequency for such mutations is therefore  $e^{-5.2}$  which equals 0.0055, as indicated in the last column (\*\*). Row 2-15 of the table lists the effects of changing attributes of the mutation, which is why A→G mutations are not explicitly listed in the table. To estimate predicted frequencies for a particular class of mutations from the table, the relevant coefficient estimates must be summed, then exponentiated. For example, the predicted frequency of a synonymous, A→G mutation in protease with shape value 0 that would create a CpG site is  $e^{-5.2-0.664}$  (taken from line 7), alternatively, one could calculate this predicted frequency as  $0.0055 * (1 - 0.49) = 0.0028$ . For a site that is CpG forming and non-synonymous, we have to add the estimates from lines 9 and 13 to get  $e^{-5.2-0.664-0.345+0.358}$  or  $0.0055 * (1 - 0.49) * (1 - 0.29) * (1 + 0.43) = 0.0029$ . For the continuous shape parameter, the value of the shape parameter for a given site should be multiplied by 0.168 (line 2) and then exponentiated, e.g., for a shape value of 0.5, the predicted frequency is  $e^{-5.2-0.5*0.664} = 0.0060$ .

|                              | Estimate | Std. Error | z value  | Pr (>  z ) | Effect   |
|------------------------------|----------|------------|----------|------------|----------|
| 1 (Intercept)                | -5.199*  | 0.035      | -147.037 | 0.000      | 0.0055** |
| 2 In reverse transcriptase   | 0.096    | 0.023      | 4.223    | 0.000      | +10%     |
| 3 Shape                      | 0.168    | 0.037      | 4.556    | 0.000      | +18%     |
| 4 T→C                        | 0.013    | 0.039      | 0.339    | 0.734      | +1%      |
| 5 C→T                        | 0.104    | 0.054      | 1.940    | 0.052      | +11%     |
| 6 G→A                        | 0.720    | 0.040      | 18.134   | 0.000      | +105%    |
| 7 CpG-forming                | -0.664   | 0.058      | -11.520  | 0.000      | -49%     |
| 8 T→C:CpG-forming            | 0.029    | 0.093      | 0.315    | 0.753      | +3%      |
| 9 Non-syn                    | -0.345   | 0.037      | -9.460   | 0.000      | -29%     |
| 10 T→C:Non-syn               | -0.375   | 0.062      | -6.017   | 0.000      | -31%     |
| 11 C→T:Non-syn               | -1.036   | 0.083      | -12.456  | 0.000      | -65%     |
| 12 G→A:Non-syn               | -1.124   | 0.058      | -19.496  | 0.000      | -65%     |
| 13 Non-syn:CpG-forming       | 0.358    | 0.090      | 3.995    | 0.000      | +43%     |
| 14 T→C:Non-syn:CpG-forming   | 0.330    | 0.153      | 2.156    | 0.031      | +39%     |
| 15 Drastic amino acid change | -0.691   | 0.034      | -20.394  | 0.000      | -50%     |

155 non-CpG-forming A→G mutations (0.0048 vs 0.002). For synonymous C→T mutations, their frequency is  
 156 not significantly different from the frequency of synonymous, non-CpG-forming A→G mutations (see line 5  
 157 in Table 1), but because their mutation rate is about double the mutation rate of A→G mutations, their  
 158 estimated cost is two times as high as for non-CpG-forming A→G mutations (0.0039 vs 0.002,  $p = 4 \cdot 10^{-05}$ ),  
 159 see Fig. 2 and Fig. S5. We find qualitatively similar results when we use mutation rates from [31].

160 Among non-synonymous mutations, we also found a strong effect of the ancestral nucleotide: C→T and  
 161 G→A mutations are both more costly than A→G and T→C mutations (Fig. 2). Again, we could not  
 162 use the GLM framework to test whether this difference was significant, but one-sided two-sample Wilcoxon  
 163 tests showed that the difference in estimated selection coefficients was highly significant ( $p = 4 \cdot 10^{-6}$  for  
 164 C→T and  $p = 3 \cdot 10^{-5}$  for G→A mutations when compared with A→G mutations). We estimated that,  
 165 among non-synonymous mutations that do not involve a drastic amino acid change nor create a CpG site,  
 166 C→T mutations are five-and-a-half times more costly than A→G mutations (0.0157 vs 0.0028), and G→A  
 167 mutations are seven times more costly than A→G mutations (0.021 vs 0.0028), see Fig. 2 and Fig. S5.

## 168 Drastic amino acid changes

169 Mutations that led to a drastic amino acid change were found at lower frequency than mutations that did  
 170 not ( $p < 0.001$ ). For example, A→G mutations that result in a drastic amino acid change are roughly twice  
 171 as costly as A→G mutations that do not (0.0057 vs 0.0028). We observed similar fold changes for the other  
 172 possible transitions (Fig. 2).

## 173 Other effects

174 Mutations in the *RT* portion of the gene had slightly higher frequencies than those in the *protease* portion  
175 ( $p < 0.001$ , line 2 in Table 1), suggesting that they are somewhat less costly. Similarly, our model predicts  
176 a small but significant effect of the shape value ( $p < 0.001$ , line 3 in Table 1), an experimentally determined  
177 measure of RNA secondary structure [39]. Specifically, sites with a higher shape value (i.e., those less likely to  
178 be part of an RNA structure) were associated with higher mutation frequencies (suggesting lower mutational  
179 costs), presumably because the secondary structure of the RNA molecule plays a functional role in HIV  
180 replication [39] (see Table 1).

## 181 2.4 Effects not captured by the GLM

182 **Outliers.** We asked whether we could use our results to find individual sites at which mutations are more  
183 costly than expected based on our current knowledge of the HIV genome. However, if we do a simple outlier  
184 analysis and focus on, say, the 5% most costly sites overall in our dataset, we will find that these are all  
185 the nonsense mutations, plus some mutations that lead to drastic amino acid changes and create CpG sites.  
186 Such analysis by itself is not very interesting, since our GLM analysis already revealed these results. Instead,  
187 we first grouped the sites in nine groups according to the GLM results (see Methods) and then to look at the  
188 outliers (5% highest selection coefficient values) within each of these groups. We made a table of all outliers  
189 (see Suppl. materials). We found that a few amino acids show up in the outlier list more than once, but  
190 this is not surprising, given that our dataset only comprises a few hundred amino acids. The vast majority  
191 of these sites do not have a known function; a select few are near the active site of the protein. In future  
192 work, it will be worth following up on those positions in *pol*.

193 **Amino acid identity.** The nature of the amino acid change (drastic or not) and the ancestral nucleotide  
194 in the consensus sequence both had an effect on costs. In addition, we found that many of the most costly  
195 non-synonymous mutations were associated with a small number of amino acid changes starting from glycine  
196 (G) and proline (P). This is consistent with our knowledge of protein structure: glycine and proline are often  
197 unique and irreplaceable, as the only cyclic and smallest amino acid, respectively. The triplets that encode  
198 these two amino acids are C and G rich (CCN for proline and GGN for glycine) which may partially explain  
199 why G→A and C→T mutations are costly. Fig 3 shows the cost of non-synonymous changes ordered by  
200 ancestral and mutant amino acid. Contrary to our results, Zanini *et al.* [31] (figure S7) found other amino  
201 acids (tryptophan (W), tyrosine (Y), cysteine (C), and also proline (P)) to contribute most to the cost,  
202 but this difference is likely due to the fact that they considered all possible mutations including nonsense  
203 mutations and synonymous mutations, which lowers the average cost of amino acids encoded by codons with  
204 synonymous mutations and increases the cost of amino acids encoded by codons with nonsense mutations.  
205 For example, tryptophan (encoded by only one codon, TGG) has no synonymous mutations and two of the  
206 three possible transitions lead to a stop codon, which makes it very costly compared to other amino acids  
207 in the Zanini analysis [31]. This might explain the discrepancy between our analyses.

208 **No effect of location in the *pol* gene.** We were interested to see whether fitness costs were distributed  
209 evenly along the *pol* gene or whether some parts of the gene harbored clusters of sites with particularly high  
210 cost mutations as was found by other studies [17]. We plotted the fitness cost point estimates along the length  
211 of the *pol* gene (i.e., the sites for which we have data) (see Fig. 4). We colored sites according to whether  
212 the transition mutation we considered was synonymous or non-synonymous, and the latter group was split  
213 into G-A and C-T mutations in light red and A-G and T-C mutations in dark pink. Visually, it is clear that  
214 there is no strong effect of location on fitness cost. There are no clear stretches of particularly high or low  
215 costs. We tested whether there was a statistically significant effect of location using a randomization test  
216 and we did this separately for synonymous and non-synonymous mutations using a sliding window approach  
217 (see Methods). We found no effect of location, although sites within the same codon did have correlated  
218 fitness costs.

## 219 2.5 Parameters for gamma distribution of fitness effects

220 In addition to the characteristics that determine the fitness costs of individual mutations, we investigated the  
221 distribution of fitness effects (DFE). This distribution is of interest to the evolutionary biology community  
222 because it affects standing genetic variation, background selection, and optimal recombination rates [16].



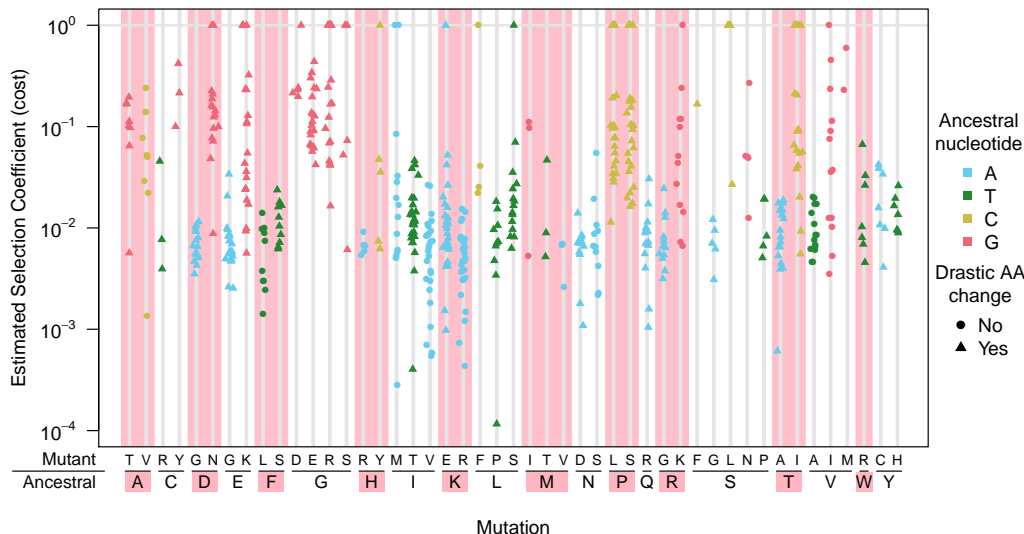

Figure 3: **Distribution of estimated selection coefficients by amino acid replacements.** Many of the most costly mutations are concentrated at a few amino acids (e.g., P (proline) and G (glycine)). The selection coefficients shown are calculated directly from mean mutation frequencies and mutation rates using the mutation-selection balance formula,  $f = u/s$ .

223 Moreover, the DFE affects the evolvability of a population: A DFE weighted toward neutral and adaptive  
 224 mutations may reflect a population with more capacity to evolve. Many viruses, however, have been found  
 225 to have a DFE composed mainly of deleterious and lethal mutations. To determine the DFE of the *pol* gene  
 226 in HIV, we used the fitness cost point estimates for synonymous and non-synonymous mutations (including  
 227 nonsense mutations) for each of the ancestral nucleotides (Fig. 5). Overall, there were few very deleterious  
 228 and lethal mutations, except for non-synonymous C→T and G→A mutations and nonsense mutations. This  
 229 is, at least partly due to the fact that we only consider transition mutations. We also estimated parameters  
 230 for the gamma distribution that best describes the entire DFE (Table 2). These parameters can be used  
 231 in studies of background selection and in other studies that involve simulations of evolving populations.  
 232 We performed this analysis also for two other datasets with *pol* sequences for multiple patients (the Zanini  
 233 dataset [45] and the Lehman [46], see Methods and suppl. materials).

-2.25in0in

Table 2: **Parameters for the gamma distribution of fitness effects for transition mutations in *pol* in 160 HIV-infected patients from the Bachelor *et al.* dataset, reflecting scale ( $\kappa$ ) and shape ( $\theta$ ).** The 'fraction lethal' is the fraction of the mutations that had a mean frequency smaller than or equal to the mutation rate, so that they are estimated to be lethal.

| Num. sites | Fraction lethal | Mut Rates from Abram 2010 |                | Mut rates from Zanini 2016 |                |
|------------|-----------------|---------------------------|----------------|----------------------------|----------------|
|            |                 | $\kappa$                  | $\theta$       | $\kappa$                   | $\theta$       |
| 870        | 0.082           | 0.334                     | 0.275          | 0.327                      | 0.333          |
|            | (0.066, 0.099)  | (0.257, 0.411)            | (0.265, 0.289) | (0.267, 0.388)             | (0.321, 0.348) |

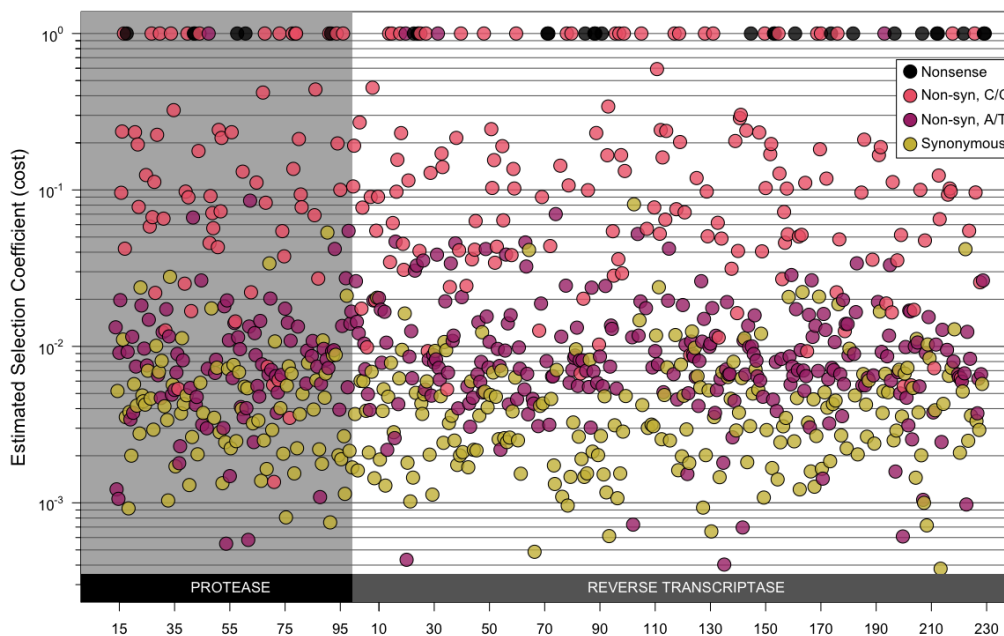

Figure 4: **Estimated selection coefficients for transition mutations along the *pol* gene.** Point estimates for the selection coefficients for each transition mutation along the *pol* gene. Synonymous mutations are shown in yellow, non-synonymous mutations are shown in light red ( $C \rightarrow T$  or  $G \rightarrow A$  mutations) and dark pink ( $T \rightarrow C$  or  $A \rightarrow G$  mutations), nonsense mutations are shown in black. This plot illustrates that estimated selection coefficients do not appear to be affected by location in the gene. Note that these histograms include mutations that create CpG sites and those that don't, which means that the effect that  $G \rightarrow A$  and  $C \rightarrow T$  mutations are more costly than non-CpG forming  $A \rightarrow G$  mutations is not visible in this figure.

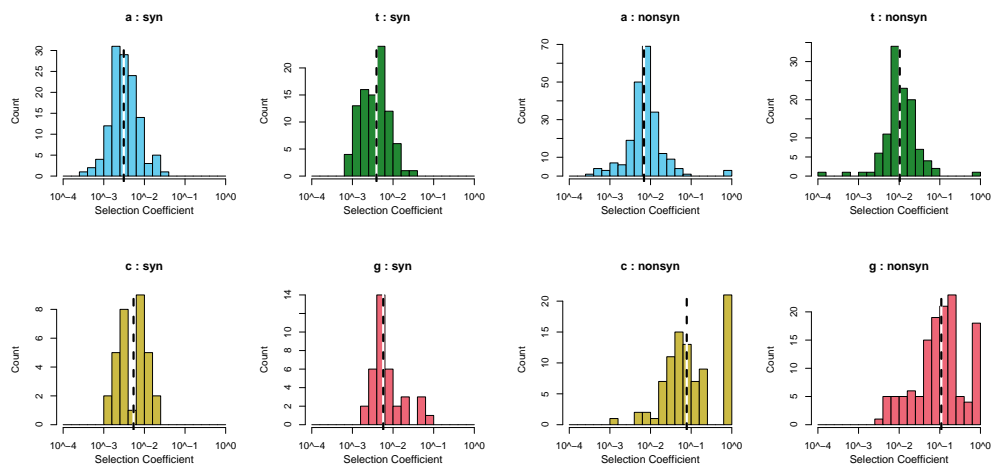

Figure 5: **Distribution of fitness costs as estimated from mutation frequencies using the mutation-selection balance formula ( $f = u/s$ ).** Most synonymous mutations (*left panel*) have very low selection coefficients. For non-synonymous mutations (*right panel*), selection coefficients are higher, especially for  $C \rightarrow T$  and  $G \rightarrow A$  mutations. Dashed vertical lines indicate median selection coefficients. Note that the scales of the y-axes differ between the individual plots.

## 2.6 Relationship between mutation frequencies within patients and within the global subtype B epidemic

Next, we wanted to determine how well the observed within-patient mutation frequencies correspond with worldwide HIV mutation frequencies. All sequences in the Bachelier *et al* dataset belonged to HIV-1 subtype B, which is the most studied HIV-1 clade. We assembled a comparison set of HIV-1 subtype B sequences from treatment-naive patients using the Stanford HIV Drug Resistance database (HIVdb); this set contained 23,742 protease sequences and 22,785 reverse transcriptase sequences [47]. Fig 11 shows the correlation between average within-patient mutation frequencies from the 160 patients analyzed in this study and global mutation frequencies calculated from the HIVdb dataset. A high correlation coefficient was detected when comparing all 870 sites (Spearman's rank correlation coefficient  $\rho = 0.68$ ), showing concordance between mutation frequencies within patients and in the global subtype B epidemic. Similarly, Zanini *et al* [31] found that fitness costs were anti-correlated with subtype diversity (Spearman's rank correlation coefficient  $\rho = -0.59$ ).

## Discussion

Our fitness cost inference approach is based on the simple but highly powerful notion that mutation frequencies are in mutation-selection balance. We began by validating the approach. First, as expected, we found a clear separation of observed frequencies for synonymous, non-synonymous and nonsense mutations (Fig. 1). Second, we found that inferred costs of drastic amino-acid alterations were higher than those of non-drastic changes (Fig. 2). This matches biological knowledge, and has been observed when analyzing long-term evolution [48, 49]. To the best of our knowledge this is the first report that physicochemical differences in amino-acids directly affect short term evolution as occurring during within-host evolution (but see [50]). These validations allowed us to focus on novel insights obtained by the method. First, we found that mutations that created new CpG dinucleotides were twice as costly as mutations that did not. Although it has been known for a while that CpG sites are depleted in genomes of HIV [42, 51, 52] and other RNA viruses [40–43], this is the first report suggesting strong selection operating against the *de novo* creation of CpG sites via mutation, to the extent that even one more CpG causes a fitness cost. Indeed, just recently it has been reported that HIV viruses with multiple CpGs in their genome are actively detected by an innate immune enzyme called ZAP, leading to inhibition of viral replication [44]. Our results hence suggest that this line of defence is particularly potent in driving the evolution of HIV, at the resolution of single nucleotide changes. Our next surprising finding was the substantial difference in fitness cost depending on which of the four nucleotides was altered. In particular, G→A and C→T mutations were two to seven times more costly than A→G mutations (discussed below). Thus, although we analyzed only a small part of the HIV genome using a dataset with limited sequencing depth, we succeeded in recovering and quantifying many known properties of mutational fitness costs, as well as discovering novel findings. Our data also allowed us to estimate parameters of DFEs, which will be useful for future studies on the evolutionary dynamics of HIV populations (Fig. 5, Table 2). Finally, we found that within-patient frequencies and global frequencies in the subtype B clade were very similar (Spearman's rank correlation coefficient  $\rho = 0.68$ ), suggesting that fitness costs are largely similar both within patients and across the pandemic.

## Comparison with other studies in viruses

In general, our results are consistent with those from a recent study on HIV-1 evolution by Zanini *et al* [31], based on a dataset described previously by the same authors [45]. Notably, both studies found a clear separation between synonymous and non-synonymous mutation frequencies, and these frequencies correlated well with global HIV diversity. Our study went on to find several novel insights. It should be noted that the proportion of lethal mutations estimated in our study (5.9%) is low compared to proportions from [31] and from *in vitro* studies on viral coding sequences (reviewed in [53]). For example, Sanjuan *et al* [22] found that 40% of random mutations in the RNA vesicular stomatitis virus were lethal. Similarly, a study by Rihn *et al* [54] of the HIV capsid found that 70% of non-synonymous mutations were lethal, which corresponds to around 47% of all mutations [54].

282 Several factors could explain why we found a lower proportion of lethal mutations as compared to other  
283 studies. First, even observed variants may represent inviable viruses, and for many sites in our dataset, the  
284 bootstrapped confidence intervals include lethality (data not shown). Second, we only considered transition  
285 mutations, whereas transversions may be more frequently lethal, as they are more often non-synonymous,  
286 more likely to lead to drastic amino acid changes, and more likely to create premature stop codons, due to  
287 the nature of the genetic code. Third, sequencing or amplification (PCR) errors may obscure our results.  
288 Many low-frequency variants in our dataset were only observed once, and it is possible that some of these  
289 were not true variants; we may thus have underestimated the percentage of lethal mutations. Fourth, we  
290 looked only at one gene, and this gene may have a different fitness landscape than other parts of the viral  
291 genome. Finally, different environments (*in vitro* vs *in vivo*) or different genetic backgrounds (usually one  
292 genetic background in the *in vitro* studies vs many in *in vivo* studies) may explain the observed differences.  
293 Future studies with more sequences and more sites will have better power to determine the true proportion  
294 of lethal mutations in HIV *in vivo*.

## 295 High costs of G→A and C→T mutations

296 Among synonymous and non-synonymous mutations, we found G→A mutations to be two-and-a-half to  
297 seven times more costly than A→G mutations. C→T mutations were found to be two to five and a half  
298 times more costly than A→G mutations. We suggest three hypotheses to explain these initially surprising  
299 results: 1. They could be an artifact caused by spurious mutation rate estimates, 2. This could be due to  
300 mutation bias present in HIV genomes, 3. This could represent a form of APOBEC3 hypermutation. We'll  
301 discuss these in the following paragraphs.

302 (1) *Mutation rates estimates.* We note that synonymous G→A mutations are present in our data at  
303 higher frequencies than A→G mutations (see Fig. 2. Naively, this would suggest that they are less costly.  
304 However, the G→A mutation rate is estimated to be so high that the observed frequencies are actually lower  
305 than expected, which, in our model translates to high costs. Synonymous C→T are equally frequent as  
306 A→G mutations, but, because they have a higher mutation rate, we conclude that they must be associated  
307 with higher costs. Hence, the mutation rate estimates are key to these results. We have two sources for  
308 mutation rate estimates from two very different studies, Abram *et al* [29, 38] (*in vitro estimates* from cell  
309 culture) and Zanini *et al* [31] (*in vivo estimates* based on accumulation of synonymous mutations). Notably,  
310 in both of these studies, G→A mutations occur at a higher rate than other transition mutations, although  
311 in the Zanini study this difference is less pronounced (Fig. 12). Using mutation rates from one or the other  
312 study does not change our findings qualitatively. If however G→A and C→T mutation rate estimates are  
313 overestimated in both studies, we cannot rule out that fitness costs of these mutations are lower than what  
314 we estimate.

315 (3) Second, the effect of costly G→A and C→T mutations might be related to a strong mutation bias  
316 in the HIV genome. G→A mutations are roughly five times more common than A→G mutations according  
317 to [29] and two and a half times more common according to [31] (Fig. 12 and Table 6). C→T mutations  
318 are twice as common as A→G mutations in according to both studies (see Table 6). Specifically, the G→A  
319 bias may have led, over long evolutionary timescales, to the well known A bias in the HIV genome [55, 56].  
320 Due to the strong mutation bias, sites at which having an A or G does not affect viral fitness would become  
321 A-biased over time. Thus, A sites would be enriched for (nearly) neutral sites, and G sites would be depleted  
322 of neutral sites, which could lead to G→A mutations being more costly, on average, than A→G mutations.  
323 A similar effect may be at play for C→T mutations, since here is also a T bias in the HIV genome, though  
324 it is not as strong as the A bias.

325 (3) *APOBEC3 hypermutation.* The effect of costly G→A mutations may be related to the activity of  
326 APOBEC3 enzymes, which hypermutate the HIV genome, leading to an increased proportion of G→A mu-  
327 tations [57–60]. We checked whether our sequences are dramatically affected by APOBEC3 hypermutation.  
328 Visual inspection of neighborjoining trees for each patient showed that there were no *pol* sequences that  
329 were hypermutated. This is probably because hypermutated viruses are mostly non-viable, and unlikely to  
330 show up when genetic material from viral particles is sequenced, which is what the current study is based  
331 on. However, APOBEC3 may also have a milder effect of slightly increasing the number of G→A mutations  
332 in the genome. The G→A mutations we observe could be linked to other G→A mutations in the genome,  
333 outside the sequenced region of *pol*. Together, these G→A mutations could be more deleterious than a single

334 A→G mutation (which we use for comparison). This could explain why the observed G→A mutations in  
335 our study are more costly.

## 336 Study limitations

337 One limitation of our study is that we focused on a small region of the HIV genome, namely 870 sites of  
338 the *pol* gene [61]. Because the patients in the Bachelier *et al* study were treated with a variety of antiviral  
339 treatments, we had to exclude drug resistance positions, as they would have been under positive selection in  
340 some of the patients. To study the costs of resistance mutations, it would be necessary to analyze samples  
341 from untreated patients [31]. Furthermore, is unknown how long the patients in our dataset were infected  
342 before samples were collected. If samples were taken soon after infection, genetic diversity in the viral  
343 population may have been low, and frequencies of some mutations may have been lower than the expected  
344  $f = u/s$ , resulting in overestimates of the selection coefficients. A second limitation is that we assumed  
345 one mutation rate for all A→G mutations, and one rate for all C→T mutations, etc. However, evidence  
346 exists that mutation rates vary along the genome, which would mean that selection coefficient estimates for  
347 individual mutations may be unreliable [62,63].

348 Finally, our *in vivo* frequency-based approach did not allow us to study epistatic interactions between  
349 mutations. Recent work on HIV, however, shows that epistatic interactions may be important. For example,  
350 such interactions play a role in determining the mutational pathway that the virus uses to escape cellular  
351 immunity [64] and to develop drug resistance [25,65,66]. It is currently unclear how the costs of mutations  
352 as determined in this study depend on their genetic background and further studies need to be designed that  
353 combine the strengths of our approach to study costs of virtually all mutations *in vivo*, with the strengths  
354 of other approaches to study epistatic effects between common mutations.

## 355 Outlook

356 The current study should be seen as a proof of concept of our *in vivo* frequency-based approach. Our  
357 results demonstrate the power of analyzing mutant frequencies from *in vivo* viral populations to study the  
358 fitness effects of mutations. We hope that soon this method will be applied to the entire HIV genome and  
359 the genomes of other fast-evolving microbes. For HIV specifically, we expect that patient samples with  
360 high viral loads will be sequenced much more deeply than in any of the studies analyzed in this article.  
361 Transversion mutations can then be analyzed in addition to transition mutations. Such a dataset will allow  
362 us to get a more fine-grained and precise picture of the costs of mutations at individual sites across the  
363 entire HIV genome, including for mutations in other genes and non-coding regions of the virus and for drug  
364 resistance mutations in *pol* and elsewhere. Because our method makes it possible to estimate *in vivo* costs,  
365 the results will contribute to our understanding of drug resistance evolution and immune escape and may  
366 also contribute to vaccine design.

## 367 Methods

### 368 Description of the data/filtering

369 We used sequences from a dataset collected by Bachelier *et al.* [61], a study that focused on patients in three  
370 clinical trials of different treatments, all based on efavirenz (a non-nucleoside RT inhibitor) in combination  
371 with NRTIs (nucleoside RT inhibitors) and/or protease inhibitors. The treatments in this study were not  
372 very effective, in part because some patients were initially prescribed monotherapy, which almost always  
373 lead to drug resistance, and in part because patients had previously been treated with some of the drugs,  
374 so their viruses were already resistant to some components of the treatment. Viral loads in these patients  
375 were typically not suppressed, which made it possible to sequence samples even during therapy. We have  
376 previously used part of this dataset to study soft and hard selective sweeps [35].

377 The Bachelier *et al.* [61] samples were cloned and Sanger-sequenced. For each patient, all available  
378 sequences were treated as one sample, even when they came from different time points. Patients with less  
379 than five sequences were excluded from the analysis, leaving us with a median of 19 sequences per patient for  
380 160 patients (3,572 sequences in total). Sequences were 984 nucleotides long and were composed of the 297



381 nucleotides that encode the HIV protease protein and the 687 that encode the beginning of RT. We excluded  
382 75 drug resistance-related sites [67] and 39 protease sites that overlap with *gag*, leaving 287 synonymous,  
383 555 non-synonymous and 28 nonsense mutations, for a total of 870 sites. Sequences were retrieved from  
384 Genbank under accession numbers AY000001 to AY003708.

## 385 Calculation of mutation frequencies

386 To identify mutations, we compared the sequences to the HIV-1 subtype B reference sequence, also known  
387 as the HXB2 sequence (Genbank accession K03455). We will refer to this reference sequence as the wildtype  
388 (WT) or ancestral sequence. To make sure that mutations in founding viruses with which patients got  
389 infected not skew our results, we added a filtering step. For each patient, sites are only included if all  
390 sequences from the first sampling time point for that patient carry the same nucleotide as the reference B  
391 WT sequence. This filtering step removed 6% of the data. We only considered transition mutations (A↔G  
392 and C↔T), excluding transversion mutations. For example, for a site with an A in the reference sequence,  
393 the frequency of a transition mutation was calculated for each patient as the number of sequences with a G  
394 divided by the number of sequences with a G or an A. Sequences with a C or a T were thus not considered  
395 at all if the reference sequence had an A in that position. In addition, if, in a given sequence, there was  
396 more than one mutation in a triplet, this triplet was removed for that specific sequence, so that all mutations  
397 could be clearly classified synonymous, non-synonymous or nonsense. Occasionally this meant that a sample  
398 from a patient had to be excluded for a given site, so for some mutations we had fewer than 160 frequencies  
399 to analyze.

400 Selection coefficients were estimated for each mutation by dividing the nucleotide-specific mutation rate  
401 by the observed average frequency (based on the mutation-selection balance formula  $f = u/s$ ). We used  
402 mutation rates as estimated by Abram *et al.* [29,38].

## 403 Sliding window approach to determine location effect

404 This analysis aims to determine whether sites that are in close proximity to each other have more similar  
405 fitness costs than expected. If the window size is 10, then we first consider the first 10 non-synonymous sites  
406 in the *pol* gene and we calculate the mean fitness effect of the mutations in that window (*window mean*).  
407 We then slide with step size 1 to sites 2 to 11 and again calculate the *window mean* fitness effect etc. In  
408 this manner we slide from the beginning to the end of the sequence and once we have all window means, we  
409 calculate the variance of the *window means*. If high cost sites are clustered spatially, than the mean fitness  
410 is high in some windows but low in others and the variance of the window means will be relatively high. We  
411 compared the variance of window means with the null expectation of no spatial clustering. To obtain a null  
412 expectation, we randomized the location of all positions, while keeping the sequence the same (e.g., each  
413 non-synonymous G-A mutation would be swapped with another non-synonymous G-A mutation). For the  
414 resulting randomized datasets we also calculated the variance of the window means. We then compared the  
415 range of variances obtained from 1000 randomizations with the variance from the real data. For synonymous  
416 sites, the observed variance of window means was never significantly higher than the variance of window  
417 means of randomized datasets, for a wide range of window sizes (2-100), which shows that there is no evidence  
418 for any location effect for synonymous sites, in other words, there are no stretches of low or high fitness cost  
419 mutations.

420 For non-synonymous sites, we found that the variance of window means for the real data was often higher  
421 than the variance of window means for the randomized data, which suggests that, for non-synonymous sites,  
422 there are stretches of the *pol* gene with higher fitness costs and stretches with lower fitness costs. We  
423 hypothesized that this was due to the fact that two neighboring nucleotides within a codon, will affect the  
424 same amino acid, and if that amino acid is important for the fitness of the virus, then mutations at both of  
425 the nucleotides will be particularly costly. To test this, we did a randomization test where we kept codons  
426 in tact, but randomized their location. For example, a codon that encodes for asparagine could be swapped  
427 with another codon that encodes for asparagine. We found that after this codon by codon randomization,  
428 we find the same variance of window means as we find in the original dataset. This shows that the location  
429 effect we see is mostly due to neighboring sites within codons.



## 430 Generalized linear model analysis

431 Using a *generalized linear model* (GLM), we predicted mutant frequencies for certain categories of mutations  
432 (e.g., synonymous, non-CpG-forming, A→G mutations) and then used the mutation-selection formula ( $f =$   
433  $u/s$ ) to predict the costs of these groups of mutations (see Fig. 10). Specifically, we fit a GLM where the  
434 response variable is whether a given nucleotide is WT or mutant, and this response variable is assumed to  
435 follow a binomial distribution, using the *glm* package in the *R* language [68]. The model we fit includes the  
436 nucleotide in the consensus sequence, its experimentally determined SHAPE value [39], whether or not the  
437 position was in the RT protein and the types of changes resulting from a transition at that position. These  
438 changes included whether a transition was non-synonymous, lead to a drastic amino acid change or formed  
439 a new CpG site. We used the following groups of amino acids and assumed that a change from one group to  
440 another was 'drastic': positive-charged (arginine (R), histidine (H), lysine (K)), negative-charged (aspartic  
441 acid (D) and glutamic acid (E)), uncharged (serine (S), threonine (T), asparagine (N) and glutamine (Q)),  
442 hydrophobic groups (alanine (A), isoleucine (I), leucine (L), phenylalanine (F), methionine (M), tryptophan  
443 (W), tyrosine (Y) and valine (V)), the special amino acids (cysteine (C), glycine (G) and proline (P)).  
444 We also fit interactions between the ancestral nucleotides, whether a transition was non-synonymous, and  
445 whether the transition formed a CpG site.

446 Note that for the GLM, actual counts were considered as opposed to frequencies. That is, if we have 20  
447 sequences for patient 1, and at a given nucleotide, we observe 2 As and 18 Gs, we used those counts. This  
448 approach automatically gives more weight to patients for whom we have more sequences. Each position in  
449 each sequence from each patient was treated as an independent observation.

450 The GLM coefficients reported in table 1 can be used to predict the probability that a mutation is  
451 observed at a given site. For example, the intercept =  $(-5.2)$  means that a synonymous, non-CpG-forming  
452 mutation in *protease* at a site with A as WT has an probability of  $\exp(-5.2) = 0.055$  to be mutated, so its  
453 predicted frequency is 0.055. For a similar site that has T as WT, we need to add 0.013 to the exponent and  
454 find a probability of  $\exp(-5.2 + 0.013) = 0.056$ .

455 To explicitly test whether two categories of mutations with different mutation rates had different selection  
456 coefficients, we used a one-sided two-sample Wilcoxon test (also known as a Mann-Whitney test). This was  
457 necessary because a GLM can only test whether a mutant of a certain category is more likely to be present  
458 than a mutant of another category (i.e., has a higher frequency). We were interested, however, in whether  
459 a mutant of a certain category is more costly than a mutant of another category. For example, synonymous  
460 C→T mutations occur at a similar frequency as synonymous, non-CpG forming A→G mutations (see Table  
461 1, line 5), but because their mutation rates are quite different, we estimate that their costs are different. (see  
462 Fig. 10).

## 463 Outlier analysis

464 We grouped the sites first in nine groups according to the GLM results and then listed outliers (5% highest  
465 selection coefficient values) in each group.

466 The groups used were:

- 467 • synonymous, non-G, non-CpG
- 468 • synonymous, non-G, CpG
- 469 • synonymous, G
- 470 • non-syn, A or T, no-CpG, no-drastic AA change
- 471 • non-syn, A or T, CpG, no-drastic AA change
- 472 • non-syn, A or T, no-CpG, drastic AA change
- 473 • non-syn, A or T, CpG, drastic AA change
- 474 • non-syn, C or G, no-CpG, no-drastic AA change
- 475 • non-syn, C or G, no-CpG, drastic AA change

## 476 Estimating a gamma distribution to fit the distribution of fitness effects

477 We fit a gamma distribution to the DFE (based directly on averaged frequencies at 870 sites and the  
478 mutation-selection balance formula  $f = u/s$ ). Transitions that were never observed (frequency of 0) were  
479 not considered when fitting the gamma distribution. The most likely shape and scale parameters for the  
480 data were found using the subplex algorithm implemented in the R package `nloptr` [69] (see Table 2).  
481 Bootstrapped confidence intervals were created by resampling the data with replacement and re-estimating  
482 the gamma distribution parameters. Selection coefficients were estimated using the mutations rates given in  
483 Abram *et al.* [29,38] and Zanini *et al.* [31].

## 484 Comparison with the global epidemic

485 A large HIV-1 sequence dataset was retrieved from the HIVdb ([http://hivdb.stanford.edu/pages/  
486 geno-rx-datasets.html](http://hivdb.stanford.edu/pages/geno-rx-datasets.html)) [47]. This dataset contains a single sequence per patient. Protease and RT  
487 sequences were downloaded in separate files. Sequences that met the following criteria were included in the  
488 analysis: treatment-naive host status and classification as HIV-1 subtype B. In total, 23,742 protease and  
489 22,785 RT sequences were collected. Average mutation frequencies for each site were calculated as explained  
490 above (e.g., including only transitions, excluding triplets with more than one mutation). Spearman's rank  
491 correlation coefficient ( $\rho$ ) was used to quantify the correlation between within-patient and global mutation  
492 frequencies.

## 493 Additional datasets

494 In order to test how transferable our method is, we repeated parts of our analysis with the Zanini *et al.*  
495 dataset [45] and the Lehman *et al.* dataset [46].

496 The Zanini [45] samples came from nine patients. There were multiple samples per patient (72 samples  
497 in total), typically collected at least a few months apart. Thus we followed Zanini *et al* in treating those  
498 samples as if they were completely independent. The sequencing method used was Illumina. We downloaded  
499 mutation frequencies for each sample (<http://hiv.tuebingen.mpg.de/data/>) and averaged frequencies  
500 across all 72 samples. The Zanini data cover the whole HIV genome, but we only considered the regions that  
501 overlap with the Bachelier data [61]. In addition, the Zanini data [45] contain sequences for different HIV  
502 subtypes (B, C and CRF01-AE); we only considered sites that were conserved between subtypes B, C and  
503 CRF01-AE and excluded resistance related sites so that 758 sites were analyzed. Mean mutation frequencies  
504 for all sites, ordered by mutation frequency are shown in Figure S1. The distribution of fitness effects is  
505 shown in Figure S3 and the estimated gamma distribution parameters in Table 5.

506 The Lehman samples were 454-sequenced. The samples were collected at seroconversion and one month  
507 later, but we only included the time point one month after seroconversion in our analysis, as we expected  
508 that the samples from the earliest time point would contain almost no genetic diversity. The sequences span  
509 approximately 540 sites in the RT protein. The Lehman data [46] contained HIV subtypes B, C and A;  
510 we only considered sites that were conserved between subtypes B, C and A and excluded resistance related  
511 sites, so that 415 sites were analyzed. Mean mutation frequencies for all sites, ordered by mutation frequency  
512 are shown in Figure S2. The distribution of fitness effects is shown in Figure S4 and the estimated gamma  
513 distribution parameters in Table 5. The Lehman dataset [46] was downloaded from the NCBI website using  
514 accession number SRP049715 ([www.ncbi.nlm.nih.gov/sra/?term=SRP049715](http://www.ncbi.nlm.nih.gov/sra/?term=SRP049715)).

## 515 Acknowledgments

516 The authors wish to thank Dmitri Petrov, Arbel Harpak, David Enard, Nandita Garud, Alan Bergland  
517 and Ryan Taylor for helpful discussions; Richard Neher, Fabio Zanini, Adam Eyre-Walker and an anony-  
518 mous reviewer for comments on earlier versions of the manuscript; Scott Roy for help aligning the Lehman  
519 sequences.

## References

- [1] Batschelet E, Domingo E, Weissmann C. The proportion of revertant and mutant phage in a growing population, as a function of mutation and growth rate. *Gene*. 1976;1(1):27–32.
- [2] Domingo E, Sabo D, Taniguchi T, Weissmann C. Nucleotide sequence heterogeneity of an RNA phage population. *Cell*. 1978;13(4):735–744.
- [3] Eigen M. Viral quasispecies. *Scient Am*. 1993;269:32–32.
- [4] Rouzine IM, Rodrigo A, Coffin J. Transition between stochastic evolution and deterministic evolution in the presence of selection: general theory and application to virology. *Microbiol Mol Biol Rev*. 2001;65(1):151–185.
- [5] Wilke CO. Quasispecies theory in the context of population genetics. *BMC Evol Biol*. 2005;5(1):44.
- [6] Biebricher CK, Eigen M. What is a quasispecies? In: *Quasispecies: Concept and Implications for Virology*. Springer; 2006. p. 1–31.
- [7] Lauring AS, Andino R. Quasispecies theory and the behavior of RNA viruses. *PLoS Pathog*. 2010;6(7):e1001005.
- [8] Pennings PS. Standing genetic variation and the evolution of drug resistance in HIV. *PLoS Comput Biol*. 2012;8(6):e1002527.
- [9] Paredes R, Lalama CM, Ribaldo HJ, Schackman BR, Shikuma C, Giguel F, et al. Pre-existing Minority Drug-Resistant HIV-1 Variants, Adherence, and Risk of Antiretroviral Treatment Failure. *J Infect Dis*. 2010;201(5):662–671. doi:10.1086/650543.
- [10] Li JZ, Paredes R, Ribaldo HJ, Svarovskaia ES, Metzner KJ, Kozal MJ, et al. Low-frequency HIV-1 drug resistance mutations and risk of NNRTI-based antiretroviral treatment failure: a systematic review and pooled analysis. *JAMA*. 2011;305(13):1327–1335.
- [11] Neher RA, Leitner T. Recombination rate and selection strength in HIV intra-patient evolution. *PLoS Comput Biol*. 2010;6(1):e1000660.
- [12] Batorsky R, Kearney MF, Palmer SE, Maldarelli F, Rouzine IM, Coffin JM. Estimate of effective recombination rate and average selection coefficient for HIV in chronic infection. *PNAS*. 2011;108(14):5661–5666.
- [13] Hartl DL, Clark AG, Clark AG. *Principles of Population Genetics*. vol. 116. Sinauer Associates, Sunderland, MA; 1997.
- [14] Trotter MV. *Mutation–Selection Balance*. eLS. 2014;.
- [15] Lawrie DS, Petrov DA. Comparative population genomics: power and principles for the inference of functionality. *Trends Genet*. 2014;30(4):133–139.
- [16] Eyre-Walker A, Keightley PD. The distribution of fitness effects of new mutations. *Nat Rev Genet*. 2007;8(8):610–618.
- [17] Mayrose I, Stern A, Burdelova EO, Sabo Y, Laham-Karam N, Zamostiano R, et al. Synonymous site conservation in the HIV-1 genome. *BMC Evol Biol*. 2013;13(1):1.
- [18] Allen TM, Altfeld M, Geer SC, Kalife ET, Moore C, O’Sullivan KM, et al. Selective escape from CD8+ T-cell responses represents a major driving force of human immunodeficiency virus type 1 HIV-1 sequence diversity and reveals constraints on HIV-1 evolution. *Journal of virology*. 2005;79(21):13239–13249.

- [19] Dahirel V, Shekhar K, Pereyra F, Miura T, Artyomov M, Talsania S, et al. Coordinate linkage of HIV evolution reveals regions of immunological vulnerability. *Proceedings of the National Academy of Sciences*. 2011;108(28):11530–11535.
- [20] Ferguson AL, Mann JK, Omarjee S, Ndung'u T, Walker BD, Chakraborty AK. Translating HIV sequences into quantitative fitness landscapes predicts viral vulnerabilities for rational immunogen design. *Immunity*. 2013;38(3):606–617.
- [21] Ferrari G, Korber B, Goonetilleke N, Liu MK, Turnbull EL, Salazar-Gonzalez JF, et al. Relationship between functional profile of HIV-1 specific CD8 T cells and epitope variability with the selection of escape mutants in acute HIV-1 infection. *PLoS Pathog*. 2011;7(2):e1001273.
- [22] Sanjuán R, Moya A, Elena SF. The distribution of fitness effects caused by single-nucleotide substitutions in an RNA virus. *PNAS*. 2004;101(22):8396–8401.
- [23] Acevedo A, Brodsky L, Andino R. Mutational and fitness landscapes of an RNA virus revealed through population sequencing. *Nature*. 2014;505(7485):686–690.
- [24] Thyagarajan B, Bloom JD. The inherent mutational tolerance and antigenic evolvability of influenza hemagglutinin. *eLife*. 2014; p. e03300.
- [25] Hinkley T, Martins J, Chappey C, Haddad M, Stawiski E, Whitcomb JM, et al. A systems analysis of mutational effects in HIV-1 protease and reverse transcriptase. *Nature Genet*. 2011;43(5):487–489.
- [26] Haddox HK, Dingens AS, Bloom JD. Experimental Estimation of the Effects of All Amino-Acid Mutations to HIV's Envelope Protein on Viral Replication in Cell Culture. *PLoS pathogens*. 2016;12(12):e1006114.
- [27] Roberts JD, Bebenek K, Kunkel TA. The accuracy of reverse transcriptase from HIV-1. *Science*. 1988;242(4882):1171–1173.
- [28] Mansky LM, Temin HM. Lower *in vivo* mutation rate of human immunodeficiency virus type 1 than that predicted from the fidelity of purified reverse transcriptase. *J Virol*. 1995;69(8):5087–5094.
- [29] Abram ME, Ferris AL, Shao W, Alvord WG, Hughes SH. Nature, position, and frequency of mutations made in a single cycle of HIV-1 replication. *J Virol*. 2010;84(19):9864–9878.
- [30] Cuevas JM, Geller R, Garijo R, López-Aldeguer J, Sanjuán R. Extremely High Mutation Rate of HIV-1 *in vivo*. *PLoS Biol*. 2015;13(9):e1002251.
- [31] Zanini F, Puller V, Brodin J, Albert J, Neher RA. *In-vivo* mutation rates and the landscape of fitness costs of HIV-1. *Virus Evolution*. 2017;3(1):vex003. doi:10.1093/ve/vex003.
- [32] Coffin JM. HIV population dynamics *in vivo*: implications for genetic variation, pathogenesis, and therapy. *Science*. 1995;267(5197):483–489.
- [33] Coffin JM, Hughes SH, Varmus HE, Boeke J, Stoye J. Retrotransposons, endogenous retroviruses, and the evolution of retroelements. Cold Spring Harbor Laboratory Press; 1997.
- [34] Douek DC, Picker LJ, Koup RA. T Cell Dynamics in HIV-1 Infection. *Annu Rev Immunol*. 2003;21(1):265–304.
- [35] Pennings PS, Kryazhimskiy S, Wakeley J. Loss and recovery of genetic diversity in adapting populations of HIV. *PLoS Genet*. 2014;10(1):e1004000.
- [36] Feder AF, Rhee SY, Holmes SP, Shafer RW, Petrov DA, Pennings PS. More effective drugs lead to harder selective sweeps in the evolution of drug resistance in HIV-1. *eLife*. 2016;5:e10670.
- [37] Karlin S. *A First Course in Stochastic Processes*. Elsevier. 2014;

- [38] Rosenbloom DI, Hill AL, Rabi SA, Siliciano RF, Nowak MA. Antiretroviral dynamics determines HIV evolution and predicts therapy outcome. *Nature medicine*. 2012;18(9):1378–1385.
- [39] Watts JM, Dang KK, Gorelick RJ, Leonard CW, Bess Jr JW, Swanstrom R, et al. Architecture and secondary structure of an entire HIV-1 RNA genome. *Nature*. 2009;460(7256):711–716.
- [40] Burns CC, Campagnoli R, Shaw J, Vincent A, Jorba J, Kew O. Genetic inactivation of poliovirus infectivity by increasing the frequencies of CpG and UpA dinucleotides within and across synonymous capsid region codons. *J Virol*. 2009;83(19):9957–9969.
- [41] Jimenez-Baranda S, Greenbaum B, Manches O, Handler J, Rabadán R, Levine A, et al. Oligonucleotide Motifs That Disappear During the Evolution of Influenza in Humans Increase IFN- $\alpha$  secretion by Plasmacytoid Dendritic Cells. *Journal of virology*. 2011;.
- [42] Cheng X, Virk N, Chen W, Ji S, Ji S, Sun Y, et al. CpG usage in RNA viruses: data and hypotheses. *PloS One*. 2013;8(9):e74109.
- [43] Atkinson NJ, Witteveldt J, Evans DJ, Simmonds P. The influence of CpG and UpA dinucleotide frequencies on RNA virus replication and characterization of the innate cellular pathways underlying virus attenuation and enhanced replication. *Nucleic Acids Res*. 2014;42(7):4527–4545.
- [44] Takata MA, Gonçalves-Carneiro D, Zang TM, Soll SJ, York A, Blanco-Melo D, et al. CG dinucleotide suppression enables antiviral defence targeting non-self RNA. *Nature*. 2017;550(7674):124–127.
- [45] Zanini F, Brodin J, Thebo L, Lanz C, Bratt G, Albert J, et al. Population genomics of intrapatient HIV-1 evolution. *eLife*. 2016;4:e11282.
- [46] Lehman DA, Baeten JM, McCoy CO, Weis JF, Peterson D, Mbara G, et al. Risk of drug resistance among persons acquiring HIV within a randomized clinical trial of single-or dual-agent preexposure prophylaxis. *J Infect Dis*. 2015; p. jiu677.
- [47] Rhee SY, Gonzales MJ, Kantor R, Betts BJ, Ravela J, Shafer RW. Human immunodeficiency virus reverse transcriptase and protease sequence database. *Nucleic Acids Res*. 2003;31(1):298–303.
- [48] Grantham R. Amino Acid Difference Formula to Help Explain Protein Evolution. *Science*. 1974;185(4154):862–864. doi:10.1126/science.185.4154.862.
- [49] Miyata T, Miyazawa S, Yasunaga T. Two types of amino acid substitutions in protein evolution. *Journal of Molecular Evolution*. 1979;12(3):219–236. doi:10.1007/BF01732340.
- [50] Nickle DC, Heath L, Jensen MA, Gilbert PB, Mullins JI, Kosakovsky Pond SL. HIV-Specific Probabilistic Models of Protein Evolution. *PLOS ONE*. 2007;2(6):1–11. doi:10.1371/journal.pone.0000503.
- [51] Greenbaum BD, Levine AJ, Bhanot G, Rabadan R. Patterns of evolution and host gene mimicry in influenza and other RNA viruses. *PLoS Pathog*. 2008;4(6):e1000079.
- [52] Greenbaum BD, Cocco S, Levine AJ, Monasson R. Quantitative theory of entropic forces acting on constrained nucleotide sequences applied to viruses. *Proceedings of the National Academy of Sciences*. 2014;111(13):5054–5059.
- [53] Sanjuán R. Mutational fitness effects in RNA and single-stranded DNA viruses: common patterns revealed by site-directed mutagenesis studies. *Philos Trans R Soc Lond B Biol Sci*. 2010;365(1548):1975–1982.
- [54] Rihn SJ, Wilson SJ, Loman NJ, Alim M, Bakker SE, Bhella D, et al. Extreme genetic fragility of the HIV-1 capsid. *PLoS Pathog*. 2013;9(6):e1003461.
- [55] van Hemert FJ, van der Kuyl AC, Berkhout B. The A-nucleotide preference of HIV-1 in the context of its structured RNA genome. *RNA Biol*. 2013;10(2):211–215.

- [56] van Hemert F, van der Kuyl AC, Berkhout B. On the nucleotide composition and structure of retroviral RNA genomes. *Virus Res.* 2014;193:16–23.
- [57] Sheehy AM, Gaddis NC, Choi JD, Malim MH. Isolation of a human gene that inhibits HIV-1 infection and is suppressed by the viral Vif protein. *Nature.* 2002;418(6898):646–650.
- [58] Chen KM, Harjes E, Gross PJ, Fahmy A, Lu Y, Shindo K, et al. Structure of the DNA deaminase domain of the HIV-1 restriction factor APOBEC3G. *Nature.* 2008;452(7183):116–119.
- [59] Holden LG, Prochnow C, Chang YP, Bransteitter R, Chelico L, Sen U, et al. Crystal structure of the anti-viral APOBEC3G catalytic domain and functional implications. *Nature.* 2008;456(7218):121–124.
- [60] Jern P, Russell RA, Pathak VK, Coffin JM. Likely role of APOBEC3G-mediated G-to-A mutations in HIV-1 evolution and drug resistance. *PLoS Pathog.* 2009;5(4):e1000367.
- [61] Bacheler LT, Anton ED, Kudish P, Baker D, Bunville J, Krakowski K, et al. Human immunodeficiency virus type 1 mutations selected in patients failing efavirenz combination therapy. *Antimicrob Agents Chemother.* 2000;44(9):2475–2484.
- [62] Abram ME, Ferris AL, Das K, Quinoñes O, Shao W, Tuske S, et al. Mutations in HIV-1 reverse transcriptase affect the errors made in a single cycle of viral replication. *Journal of virology.* 2014;88(13):7589–7601.
- [63] Geller R, Estada Ú, Peris JB, Andreu I, Bou JV, Garijo R, et al. Highly heterogeneous mutation rates in the hepatitis C virus genome. *Nat Microbiol.* 2016; p. 16045.
- [64] Barton JP, Goonetilleke N, Butler TC, Walker BD, McMichael AJ, Chakraborty AK. Relative rate and location of intra-host HIV evolution to evade cellular immunity are predictable. *Nature communications.* 2016;7.
- [65] Beerenwinkel N, Däumer M, Sing T, Rahnenführer J, Lengauer T, Selbig J, et al. Estimating HIV evolutionary pathways and the genetic barrier to drug resistance. *Journal of Infectious Diseases.* 2005;191(11):1953–1960.
- [66] Theys K, Deforche K, Libin P, Camacho RJ, Van Laethem K, Vandamme AM. Resistance pathways of human immunodeficiency virus type 1 against the combination of zidovudine and lamivudine. *Journal of General Virology.* 2010;91(8):1898–1908.
- [67] Johnson VA, Calvez V, Günthard HF, Paredes R, Pillay D, Shafer R, et al. 2011 Update of the Drug Resistance Mutations in HIV-1. *HIV Med.* 2010;18:156–163.
- [68] R Core Team. R: A Language and Environment for Statistical Computing; 2014. Available from: <http://www.R-project.org/>.
- [69] Johnson SG. The NLOpt nonlinear-optimization package. (R package). 2008;.

## Supporting information

**S1 File.** Mutation frequencies and estimated selection coefficients from the Bacheler [61] dataset.



Table 3: **List of outlier sites with highest selection coefficients in protease.** All sites were grouped in 9 groups, then the 5% highest selection coefficients were recorded in each group.

|     | WT | MUT | num | HXB2 | WTAA | MUTAA | bigAACChange | CpG | EstSelCoeff |
|-----|----|-----|-----|------|------|-------|--------------|-----|-------------|
| 49  | g  | a   | 49  | 2301 | G    | R     | 1            | 0   | 1.00        |
| 67  | c  | t   | 67  | 2319 | L    | L     | 0            | 0   | 0.02        |
| 79  | g  | a   | 79  | 2331 | G    | R     | 1            | 0   | 1.00        |
| 88  | g  | a   | 88  | 2340 | D    | N     | 1            | 0   | 1.00        |
| 99  | a  | g   | 99  | 2351 | L    | L     | 0            | 0   | 0.03        |
| 100 | g  | a   | 100 | 2352 | E    | K     | 1            | 0   | 1.00        |
| 112 | t  | c   | 112 | 2364 | L    | L     | 0            | 0   | 0.01        |
| 118 | g  | a   | 118 | 2370 | G    | R     | 1            | 0   | 1.00        |
| 124 | t  | c   | 124 | 2376 | W    | R     | 1            | 1   | 0.07        |
| 131 | c  | t   | 131 | 2383 | P    | L     | 1            | 0   | 1.00        |
| 141 | a  | g   | 141 | 2393 | I    | M     | 0            | 0   | 1.00        |
| 186 | a  | g   | 186 | 2438 | I    | M     | 0            | 0   | 0.09        |
| 202 | g  | a   | 202 | 2454 | G    | R     | 1            | 0   | 1.00        |
| 207 | t  | c   | 207 | 2459 | H    | H     | 0            | 0   | 0.03        |
| 218 | g  | a   | 218 | 2470 | G    | D     | 1            | 0   | 1.00        |
| 232 | g  | a   | 232 | 2484 | G    | R     | 1            | 0   | 1.00        |
| 235 | c  | t   | 235 | 2487 | P    | S     | 1            | 0   | 1.00        |
| 236 | c  | t   | 236 | 2488 | P    | L     | 1            | 0   | 1.00        |
| 270 | g  | a   | 270 | 2522 | L    | L     | 0            | 0   | 0.05        |
| 272 | c  | t   | 272 | 2524 | T    | I     | 1            | 0   | 1.00        |
| 278 | t  | c   | 278 | 2530 | I    | T     | 1            | 0   | 0.04        |
| 280 | g  | a   | 280 | 2532 | G    | S     | 1            | 0   | 1.00        |
| 287 | c  | t   | 287 | 2539 | T    | I     | 1            | 0   | 1.00        |
| 291 | a  | g   | 291 | 2543 | L    | L     | 0            | 0   | 0.02        |
| 293 | a  | g   | 293 | 2545 | N    | S     | 0            | 0   | 0.05        |

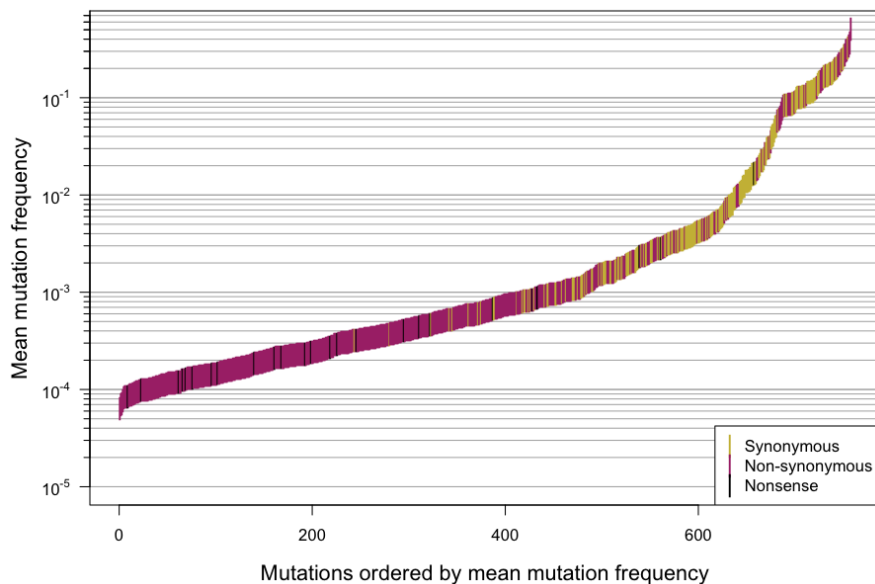

Figure 6: **Fig S1: Mutation frequency for the Zanini dataset [45].** Mutation frequency for 758 *pol* sites from the Zanini dataset [45], ordered by mutation frequency.

Table 4: **List of outlier sites with highest selection coefficients in reverse transcriptase.** All sites were grouped in 9 groups, then the 5% highest selection coefficients were recorded in each group.

|     | WT | MUT | num | HXB2 | WTAA | MUTAA | bigAACChange | CpG | EstSelCoeff |
|-----|----|-----|-----|------|------|-------|--------------|-----|-------------|
| 301 | a  | g   | 4   | 2554 | I    | V     | 0            | 1   | 0.03        |
| 324 | a  | g   | 27  | 2577 | P    | P     | 0            | 1   | 0.02        |
| 337 | c  | t   | 40  | 2590 | P    | S     | 1            | 0   | 1.00        |
| 340 | g  | a   | 43  | 2593 | G    | R     | 1            | 0   | 1.00        |
| 344 | t  | c   | 47  | 2597 | M    | T     | 1            | 1   | 0.05        |
| 349 | g  | a   | 52  | 2602 | G    | S     | 1            | 0   | 1.00        |
| 355 | a  | g   | 58  | 2608 | K    | E     | 1            | 0   | 1.00        |
| 371 | c  | t   | 74  | 2624 | P    | L     | 1            | 0   | 1.00        |
| 377 | c  | t   | 80  | 2630 | T    | I     | 1            | 0   | 1.00        |
| 390 | a  | g   | 93  | 2643 | I    | M     | 0            | 0   | 1.00        |
| 409 | t  | c   | 112 | 2662 | C    | R     | 1            | 1   | 0.05        |
| 415 | g  | a   | 118 | 2668 | E    | K     | 1            | 0   | 1.00        |
| 438 | t  | c   | 141 | 2691 | I    | I     | 0            | 0   | 0.01        |
| 440 | c  | t   | 143 | 2693 | S    | L     | 1            | 0   | 1.00        |
| 442 | a  | g   | 145 | 2695 | K    | E     | 1            | 0   | 0.04        |
| 464 | a  | g   | 167 | 2717 | Y    | C     | 1            | 0   | 0.04        |
| 475 | g  | a   | 178 | 2728 | V    | I     | 0            | 0   | 1.00        |
| 485 | t  | c   | 188 | 2738 | I    | T     | 1            | 0   | 0.05        |
| 486 | a  | g   | 189 | 2739 | I    | M     | 0            | 0   | 0.03        |
| 518 | t  | c   | 221 | 2771 | L    | S     | 1            | 0   | 0.07        |
| 530 | g  | a   | 233 | 2783 | R    | K     | 0            | 0   | 1.00        |
| 535 | c  | t   | 238 | 2788 | L    | F     | 0            | 0   | 1.00        |
| 583 | c  | t   | 286 | 2836 | H    | Y     | 1            | 0   | 1.00        |
| 587 | c  | t   | 290 | 2840 | P    | L     | 1            | 0   | 1.00        |
| 592 | g  | a   | 295 | 2845 | G    | R     | 1            | 0   | 1.00        |
| 603 | g  | a   | 306 | 2856 | K    | K     | 0            | 0   | 0.08        |
| 607 | a  | g   | 310 | 2860 | K    | E     | 1            | 0   | 0.05        |
| 609 | a  | g   | 312 | 2862 | K    | K     | 0            | 0   | 0.01        |
| 611 | c  | t   | 314 | 2864 | S    | L     | 1            | 0   | 1.00        |
| 641 | a  | g   | 344 | 2894 | Y    | C     | 1            | 0   | 0.04        |
| 647 | c  | t   | 350 | 2900 | S    | L     | 1            | 0   | 1.00        |
| 652 | c  | t   | 355 | 2905 | P    | S     | 1            | 0   | 1.00        |
| 666 | c  | t   | 369 | 2919 | D    | D     | 0            | 0   | 0.01        |
| 680 | c  | t   | 383 | 2933 | T    | I     | 1            | 0   | 1.00        |
| 689 | c  | t   | 392 | 2942 | T    | I     | 1            | 0   | 1.00        |
| 745 | c  | t   | 448 | 2998 | P    | S     | 1            | 0   | 1.00        |
| 760 | g  | a   | 463 | 3013 | G    | R     | 1            | 0   | 1.00        |
| 771 | a  | g   | 474 | 3024 | A    | A     | 0            | 1   | 0.02        |
| 774 | a  | g   | 477 | 3027 | I    | M     | 0            | 0   | 0.03        |
| 786 | c  | t   | 489 | 3039 | S    | S     | 0            | 0   | 0.02        |
| 802 | g  | a   | 505 | 3055 | E    | K     | 1            | 0   | 1.00        |
| 806 | c  | t   | 509 | 3059 | P    | L     | 1            | 0   | 1.00        |
| 824 | c  | t   | 527 | 3077 | P    | L     | 1            | 0   | 1.00        |
| 825 | a  | g   | 528 | 3078 | P    | P     | 0            | 1   | 0.02        |
| 875 | t  | c   | 578 | 3128 | L    | S     | 1            | 0   | 1.00        |
| 949 | g  | a   | 652 | 3202 | D    | N     | 1            | 0   | 1.00        |
| 951 | c  | t   | 654 | 3204 | D    | D     | 0            | 0   | 0.01        |
| 973 | c  | t   | 676 | 3226 | P    | S     | 1            | 0   | 1.00        |

Table 5: **Table S1: Parameters for the gamma distribution of fitness costs for the Bacheler, Zanini and Lehman datasets [45, 46, 61].** Parameters for the gamma distribution of fitness costs for *pol* mutations based on mutation frequencies the Bacheler, Zanini and Lehman datasets, reflecting scale ( $\kappa$ ) and shape ( $\theta$ ). The "fraction lethal" is the fraction of the mutations that had a mean frequency smaller than or equal to the mutation rate, so that they are estimated to be lethal.

|          | Sites | Scale                   | Shape                   | Scale                   | Shape                   | Lethal                  |
|----------|-------|-------------------------|-------------------------|-------------------------|-------------------------|-------------------------|
| Bacheler | 870   | 0.334<br>(0.257, 0.411) | 0.275<br>(0.265, 0.289) | 0.327<br>(0.267, 0.388) | 0.333<br>(0.321, 0.348) | 0.082<br>(0.066, 0.099) |
| Zanini   | 758   | 0.041<br>(0.037, 0.045) | 0.645<br>(0.605, 0.687) | 0.114<br>(0.098, 0.129) | 0.571<br>(0.535, 0.61)  | 0<br>(0, 0)             |
| Lehman   | 415   | 0.172<br>(0.107, 0.249) | 0.273<br>(0.25, 0.305)  | 0.245<br>(0.182, 0.317) | 0.301<br>(0.278, 0.33)  | 0.029<br>(0.014, 0.046) |

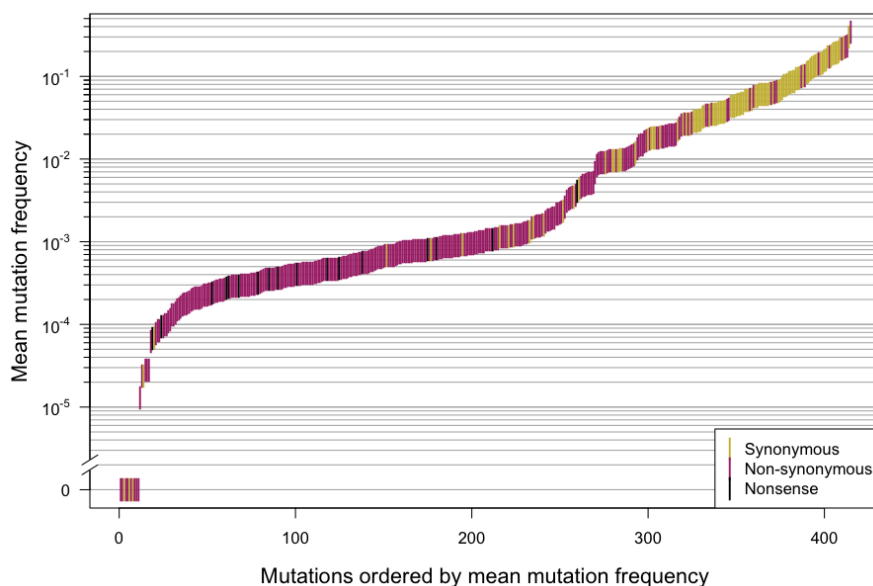

Figure 7: **Fig S2: Mutation frequency for the Lehman dataset [46].** Mutation frequency for 621 reverse transcriptase sites from the Lehman dataset [46], ordered by mutation frequency.

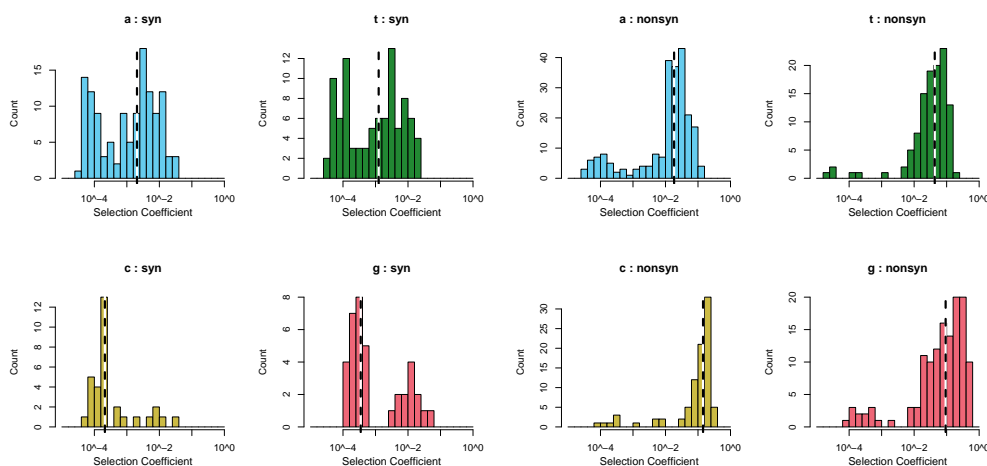

Figure 8: **Fig S3: Distribution of fitness costs for the Zanini dataset [45].** Distribution of fitness costs for non-synonymous and synonymous mutations for the Zanini dataset [45]. Nonsense mutations are included in the non-synonymous mutations. Note that the scale of the y-axis differs between the graphs.

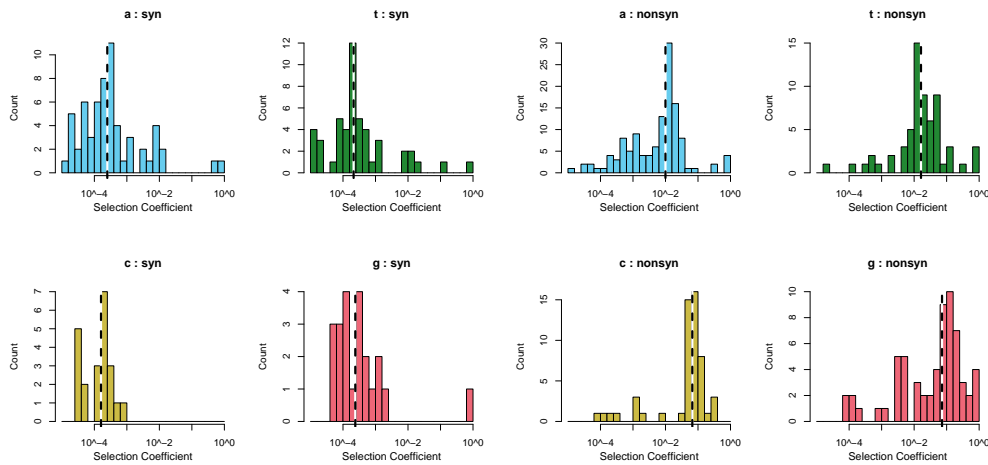

Figure 9: **Fig S4: Distribution of fitness costs for the Lehman dataset [46].** Distribution of fitness costs for non-synonymous and synonymous reverse transcriptase mutations from the Lehman dataset [46]. Nonsense mutations are included in the non-synonymous mutation category. Note that the scale of the y-axis differs between the graphs.

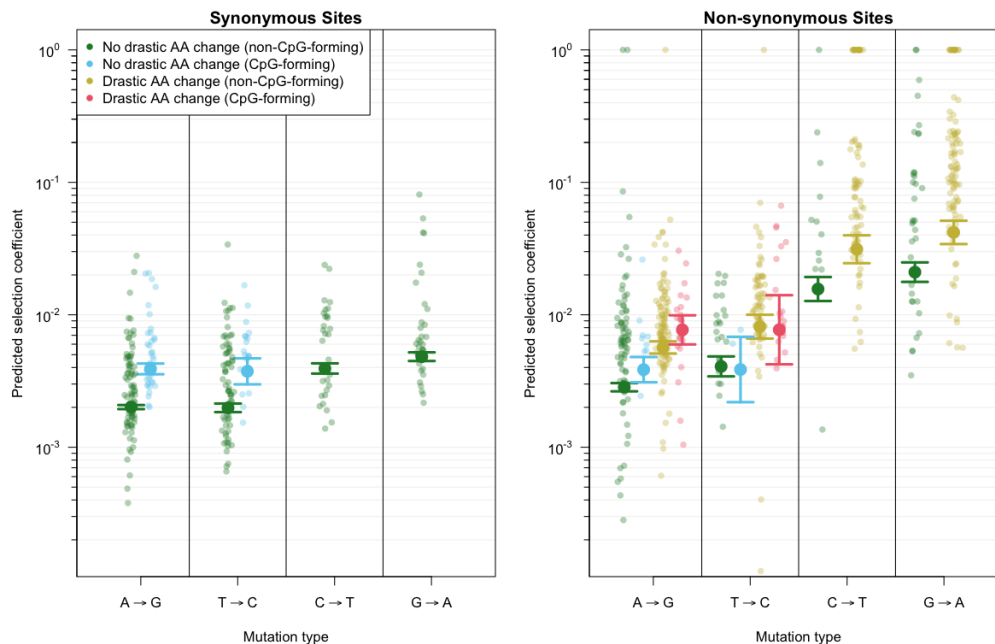

Figure 10: **Fig S5: Estimated selection coefficients for different mutation classes.** Selection coefficients for transitions at every nucleotide site in the *pol* sequence show that CpG-forming mutations are more costly than non-CpG-forming mutations and that mutations that involve a drastic amino acid change are more costly than mutations that do not. Selection coefficients were estimated using a generalized linear model and sequence data from 160 HIV-infected patients. Shown are predicted selection coefficients for synonymous (left) and non-synonymous (right) mutations that do not involve a drastic amino acid change and either create CpG sites (blue) or do not (green). For non-synonymous mutations, predictions are also shown for mutations that do involve drastic amino acid changes and either create CpG sites (light red) or do not (yellow).

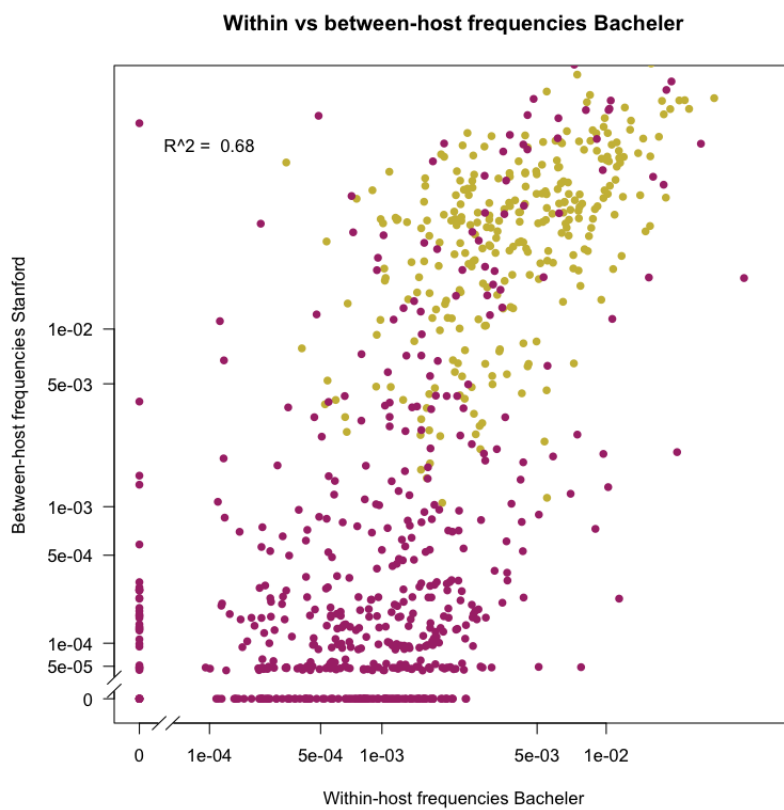

Figure 11: **Fig S6: Correlation of within-patient mutation frequencies and global between-patient subtype B mutation frequencies.** A correlation (Spearman's rank correlation coefficient  $\rho = 0.68$ ) exists between average *pol* mutation frequencies at the within-patient level (in the 160 patients analyzed in this study) and mutant frequencies in the global subtype B epidemic (23,742 protease and 22,785 reverse transcriptase consensus sequences from the HIVdb [47]). Values shown on a log scale. Non-synonymous mutations are shown in dark pink, synonymous mutations in yellow.

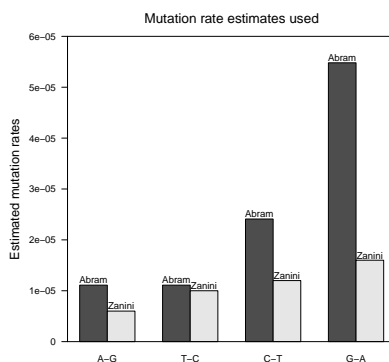

Figure 12: **Fig S7: Mutation rate estimates per replication from Abram *et al.* [62] as calculated by Rosenbloom *et al.* [38] and mutation rate per day from Zanini *et al.* [31].**

Table 6: **Table S2: Mutation rate estimates per replication from Abram *et al.* [62] as calculated by Rosenbloom *et al.* [38] and mutation rate per day from Zanini *et al.* [31].**

|    | Nucleotide substitution | Abram estimate | Zanini estimate |
|----|-------------------------|----------------|-----------------|
| 1  | T→C                     | 1.11E-05       | 1.00E-05        |
| 2  | T→A                     | 1.34E-05       | 3.00E-06        |
| 3  | T→G                     | 3.60E-06       | 3.00E-06        |
| 4  | C→T                     | 2.41E-05       | 1.20E-05        |
| 5  | C→A                     | 6.46E-06       | 5.00E-06        |
| 6  | C→G                     | 1.70E-07       | 5.00E-07        |
| 7  | A→T                     | 7.93E-07       | 7.00E-07        |
| 8  | A→C                     | 5.29E-07       | 9.00E-07        |
| 9  | A→G                     | 1.11E-05       | 6.00E-06        |
| 10 | G→T                     | 8.46E-07       | 2.00E-06        |
| 11 | G→C                     | 8.46E-07       | 1.00E-07        |
| 12 | G→A                     | 5.48E-05       | 1.60E-05        |
